# Supplementary material for: MUC1 Expression Affects the Immunoflogosis in Renal Cell Carcinoma Microenvironment through Complement System Activation and Immune Infiltrate Modulation
Source: MDPI journal article supplement (doi:10.3390/ijms24054814), 2023-03-02
Supplement: s1 [file s1]

| <b>Variable</b>    | <b>n=36</b> |
|--------------------|-------------|
| Age (years)        |             |
| median             | 61          |
| range              | 27-82       |
| Gender             |             |
| Male               | 23 (63.8%)  |
| Female             | 13 (36.2%)  |
| Dimensions (cm)    |             |
| median             | 5.0         |
| range              | 3 -10       |
| Pathological stage |             |
| pT1                | 22 (62%)    |
| pT2                | 9 (25%)     |
| pT3                | 5 (13%)     |
| pN+                | 7 (19.4%)   |
| cM+                | 3 (8.3%)    |
| Fuhrman grade      |             |
| G1-2               | 24 (66.7%)  |
| G3-4               | 12 (33.3%)  |

**Table S1:** Clinical and pathological characteristics of tissues collected from patients who underwent radical or partial nephrectomy for ccRCC. These specimens were used for Immunohistochemistry, indirect immunofluorescence and confocal laser scanning microscopy.
