# Supplementary material for: MUC1 Expression Affects the Immunoflogosis in Renal Cell Carcinoma Microenvironment through Complement System Activation and Immune Infiltrate Modulation
Source: MDPI journal article supplement (doi:10.3390/ijms24054814), 2023-03-02
Supplement: s1 [file s1]

| <b>Variable</b>                                                | <b>n=86</b>                                            |
|----------------------------------------------------------------|--------------------------------------------------------|
| <b>Age (years)</b><br>median<br>95% CI                         | 61<br>59-65                                            |
| <b>Gender</b><br>Male<br>Female                                | 53 (62%)<br>33 (38%)                                   |
| <b>Dimensions (cm)</b><br>median<br>95% CI                     | 4.5<br>4.0 - 5.0                                       |
| <b>Pathological stage</b><br>pT1a<br>pT1b<br>pT2<br>pT3<br>pT4 | 33 (38%)<br>24 (28%)<br>14 (16%)<br>12 (14%)<br>3 (4%) |
| pN+                                                            | 6 (7%)                                                 |
| cM+                                                            | 5 (6%)                                                 |
| <b>Fuhrman grade</b><br>G1-2<br>G3-4                           | 52 (61%)<br>34 (39%)                                   |
| <b>CA15-3 (U/mL)</b><br>Median<br>95% CI<br>range              | 23.9<br>21.2 – 28.3<br>6.20 – 85.0                     |
| <b>PTX3 (ng/mL)</b><br>Median<br>95% CI<br>range               | 2.73<br>2.33 – 3.17<br>0.79 – 8.87                     |
| <b>KTR</b><br>Median<br>95% CI<br>range                        | 4.0<br>3.35 – 4.51<br>1.90 – 10.5                      |
| <b>NLR</b><br>Median<br>95% CI<br>range                        | 2.12<br>1.91 – 2.46<br>1.01 – 5.29                     |

|            |               |
|------------|---------------|
| <b>PLR</b> |               |
| Median     | 162.6         |
| 95% CI     | 136.7 – 185.4 |
| range      | 64.0 – 428.3  |
| <b>MLR</b> |               |
| Median     | 0.26          |
| 95% CI     | 0.23 – 0.32   |
| range      | 0.12 – 0.99   |

**Table S2:** Clinical and pathological characteristics of patients enrolled for serum biomarkers evaluation. KTR: kynurenine-to-tryptophan ratio; NLR: neutrophil-to-lymphocyte ratio; PLR: platelet-to-lymphocyte ratio; MLR: monocyte-to-lymphocyte ratio.
